# Supplementary material for: High-accuracy analyses of key minor and trace elements in zircon by electron probe microanalysis
Source: Royal Society of Chemistry journal article supplement (doi:10.1039/d5ja00150a), 2025-11-03
Supplement: d5ja00150a3.xlsx [file d5ja00150a3.xlsx]

## Sheet: Supplemental Table S2
Supplemental Table S2. Element compositions of the GJ-1 zircon standard determined using different method.
Comment	SiO2	ZrO2	Y	Hf	Ti	Yb	Lu	Th	U	Ce	Nd	Sm	Eu	Gd	Tb	Dy	Ho	Er	Tm	Ta	Pb
	wt.%	wt.%	μg/g	μg/g	μg/g	μg/g	μg/g	μg/g	μg/g	μg/g	μg/g	μg/g	μg/g	μg/g	μg/g	μg/g	μg/g	μg/g	μg/g	μg/g	μg/g
aGJ-1-1-01	32.8056	66.0795	268.619	7876.91	5.73777	62.1766	13.574	9.91005	322.953	16.7658	0.623342	1.60634	1.02091	7.33254	2.0799	21.0629	7.13658	33.0773	6.506	0.472947
aGJ-1-1-02	32.4798	66.4083	267.132	7866.14	4.12249	63.3847	13.6448	9.81183	322.862	16.6881	0.592008	1.42657	1.06154	7.54422	2.03265	21.599	6.92994	32.7919	6.40532	0.497753
aGJ-1-1-03	32.6163	66.266	266.317	7872.7	6.87783	62.2397	13.6646	9.76569	319.445	16.7127	0.643652	1.55929	1.09021	7.13763	1.97208	21.0414	6.97792	32.8453	6.48983	0.4764
aGJ-1-1-04	32.2179	66.6725	267.909	7857.96	4.38515	63.7504	13.7793	9.88603	321.806	16.9083	0.555327	1.45713	1.03869	7.32617	1.99805	21.0895	7.02377	33.2288	6.5013	0.472231
aGJ-1-1-05	32.5593	66.3273	269.444	7879.37	4.05604	62.9883	13.9638	9.71918	321.971	16.7249	0.627788	1.44803	1.03544	7.1778	2.01973	21.2939	7.13863	33.0545	6.51023	0.500313
aGJ-1-1-06	32.5236	66.3622	268.492	7876.2	5.8281	63.2294	13.7067	9.68078	324.31	16.6193	0.620067	1.51334	1.06925	7.39704	2.06509	21.5009	7.01866	33.1032	6.45941	0.502088
aGJ-1-1-07	32.2221	66.6576	269.401	7902.77	4.31513	63.3952	13.5497	9.73689	324.495	16.7956	0.753694	1.43347	0.975217	7.32658	2.06178	21.8148	7.19023	33.344	6.47758	0.525019
aGJ-1-1-08	32.5864	66.3029	268.121	7871.87	4.55093	63.7539	13.7777	9.60559	323.256	16.5676	0.544521	1.4083	0.994786	6.97017	2.03682	21.1581	6.91643	32.5455	6.48374	0.500603
aGJ-1-1-09	32.947	65.9415	268.53	7875.11	3.69834	62.7416	13.7702	10.0011	328.172	16.7806	0.600909	1.52559	1.07573	6.71262	2.00071	20.8892	6.94974	33.059	6.49137	0.478734
aGJ-1-2-1	32.9556	66.0463	257.657	7482.15	4.09084	64.0576	12.6011	9.69093	341.835	16.3981	0.53315	1.60878	0.873538	7.07295	2.08979	20.214	6.85797	30.9086	6.43766	0.496209
aGJ-1-2-2	32.5028	66.4992	260.078	7470.23	4.49498	62.7177	12.5246	9.17266	332.563	16.1012	0.527157	1.50493	0.937379	6.61695	1.90143	20.6222	6.77658	31.1796	6.32862	0.512985
aGJ-1-2-3	32.3037	66.6931	260.799	7444.59	3.89318	63.1092	12.6244	9.28692	336.653	16.6048	0.67445	1.7619	0.974982	6.94046	1.9016	20.6144	6.87363	30.7917	6.51832	0.447179
aGJ-1-2-4	32.5611	66.4634	256.656	7242.72	3.58364	62.5819	12.3418	9.31523	326.822	16.3257	0.64782	1.39332	1.01628	7.03875	1.90567	20.7428	6.86481	30.6651	6.18619	0.495208
aGJ-1-2-5	32.2189	66.7957	257.617	7311.71	3.55885	61.9797	12.2236	9.15231	327.777	16.2296	0.522422	1.30882	0.936425	7.0374	1.8345	19.9861	6.72691	30.9653	6.38819	0.420329
aGJ-1-2-6	32.4834	66.544	250.569	7259.79	4.16885	59.9173	11.8917	9.13875	320.72	16.4273	0.607491	1.54753	0.922952	7.30688	1.93001	19.0816	6.51263	29.5812	6.2378	0.499917
aGJ-1-2-7	32.4108	66.6094	252.807	7336.05	4.05459	60.2394	11.9418	9.30688	328.996	16.4639	0.541728	1.41657	1.08155	6.42538	1.8924	20.012	6.5998	30.1471	6.23501	0.476463
aGJ-1-2-8	32.7416	66.2751	251.76	7345.85	5.0998	60.7334	12.0484	9.06482	326.85	16.497	0.666607	1.68768	0.965463	6.93241	1.82402	19.4758	6.53765	29.8043	6.0883	0.470778
aGJ-1-2-9	32.6607	66.3414	252.128	7323.64	3.88657	60.9254	12.0577	9.37341	327.691	16.2921	0.683945	1.32824	0.969045	6.87031	1.81629	19.9743	6.54419	28.8697	6.11906	0.483462
aGJ-1-2-10	32.7898	66.2129	253.618	7431.89	3.28785	61.0343	12.3257	9.71018	327.133	16.6657	0.54069	1.45384	0.929659	7.05312	1.86873	19.7727	6.77825	30.6071	6.08366	0.451914
bGJ-1-3-1	35.1837	63.6679	251.021	7464.34	2.82915	64.0914	12.9678	9.73777	337.139	16.2582	0.628429	1.46477	1.11475	7.37225	2.03017	20.8602	7.04503	30.5576	6.51758	0.521985	34.2322
bGJ-1-3-2	34.8036	64.0322	254.976	7624.09	3.51662	64.7872	13.1172	10.043	341.058	16.3067	0.591217	1.46556	1.12578	7.28422	2.01171	21.1759	7.21034	30.5389	6.56745	0.473129	34.3086
bGJ-1-3-3	35.1066	63.726	257.991	7600.93	4.02332	62.742	13.2089	9.80922	334.02	16.304	0.643225	1.47356	1.06173	7.36671	1.97443	21.1667	7.17421	30.5709	6.59878	0.520666	34.3998
bGJ-1-3-4	34.9425	63.9056	243.34	7490.85	3.71096	63.3143	12.9012	9.79288	325.411	15.6892	0.6179	1.40242	0.884583	7.03001	1.98379	20.1582	6.91822	29.934	6.36174	0.471934	33.9653
bGJ-1-3-5	35.2083	63.6546	245.906	7449.85	3.91416	62.8348	12.7484	9.92941	328.478	15.9448	0.632255	1.4051	0.984132	6.92569	1.95286	20.0105	6.99153	29.322	6.37813	0.524339	33.6957
bGJ-1-3-6	33.3778	65.4556	249.254	7646.41	3.19568	64.5963	13.1156	10.0811	332.956	16.4838	0.504706	1.47432	0.947579	7.13814	1.94765	21.2294	6.98774	30.6061	6.66605	0.498117	34.7393
bGJ-1-3-7	33.9003	64.9603	253.458	7388.46	2.93844	63.8787	12.7942	9.66631	334.249	15.8543	0.607463	1.46527	0.975452	7.02668	1.97639	20.4444	6.94146	30.4099	6.41727	0.499408	34.2375
bGJ-1-3-8	34.2253	64.6278	248.199	7450.33	3.55591	63.4997	13.13	9.77812	338.992	15.8332	0.549372	1.52489	1.01685	7.18313	1.93301	20.5928	6.99173	30.546	6.59782	0.493156	34.3427
bGJ-1-3-9	34.219	64.6464	247.098	7393.52	3.78387	61.5812	12.9638	9.50071	329.14	15.419	0.606812	1.40167	1.08526	6.60653	1.96937	19.9772	6.9402	29.6836	6.42564	0.45947	33.3853
bGJ-1-3-10	34.0928	64.7962	246.254	7220.25	4.14875	61.9764	12.4466	9.51058	325.995	15.7012	0.566943	1.37256	0.996114	6.93198	1.89632	19.8845	6.74182	29.9513	6.31852	0.478579	33.5683
cGJ-1-4-1	34.2967	64.59	242.751	7258.7	3.39944	60.859	12.5966	9.42991	328.556	15.6409	0.511559	1.49487	0.995913	6.70077	1.91284	19.975	6.92067	29.1497	6.26087	0.44847	33.2819
cGJ-1-4-2	34.0744	64.8044	246.055	7289.31	4.00882	62.4146	12.8014	9.46364	324.928	15.7765	0.62916	1.56229	1.06203	6.80759	1.94674	20.0224	6.87934	29.6141	6.39802	0.463387	33.2627
cGJ-1-4-3	33.7909	65.0729	248.842	7381.46	3.61772	62.3291	12.7978	9.56074	329.367	15.8927	0.592832	1.46706	0.967417	7.12213	1.94744	20.1848	6.92552	29.9309	6.36588	0.450458	33.8139
cGJ-1-4-4	32.9763	65.8872	254.694	7376.4	3.81919	63.7618	12.8059	9.66955	330.52	15.6508	0.627462	1.48187	1.08684	7.10918	1.96368	20.3172	6.99683	30.2016	6.49846	0.486223	33.8289
cGJ-1-4-5	33.7508	65.1115	252.048	7412.35	3.90007	63.8232	12.9946	9.97851	335.855	16.1018	0.651903	1.38782	1.04119	7.09337	1.98272	20.821	7.00167	30.3034	6.42233	0.477467	33.831
cGJ-1-4-6	33.0255	65.8602	240.826	7242.22	4.211	60.0116	12.1802	9.419	323.22	15.442	0.533107	1.37932	0.995096	6.90396	1.85587	19.6005	6.51582	29.5052	6.13539	0.481001	32.1301
cGJ-1-4-7	33.1301	65.7453	240.103	7351.29	3.84036	60.3618	12.3987	9.55474	328.619	15.979	0.603942	1.41216	0.947909	6.80823	1.94042	19.4005	6.86526	28.8147	6.33602	0.509603	32.3329
cGJ-1-4-8	33.467	65.3895	250.848	7456.01	2.96193	61.6746	12.763	9.77216	328.288	15.9904	0.645887	1.44168	0.984149	7.15509	1.93862	19.99	6.93572	29.7628	6.26508	0.47373	32.7725
cGJ-1-4-9	33.5873	65.2837	245.481	7365.43	4.49654	60.6028	12.2892	9.51959	324.907	15.8564	0.580806	1.46892	0.991116	6.701	1.90288	19.4284	6.72678	29.2562	6.21904	0.482205	32.2696
cGJ-1-4-10	32.5555	66.3212	238.472	7326.03	3.84058	61.05	12.4774	9.60952	322.726	15.5218	0.636673	1.37233	1.00364	6.6462	1.8821	19.6144	6.62782	29.1767	6.20597	0.501172	31.7764
cGJ-1-4-11	32.6389	66.2214	249.035	7459.57	3.53459	61.5758	12.5459	9.55818	321.456	16.1466	0.547363	1.51062	0.977234	7.16989	1.91395	19.9224	6.71301	29.3907	6.29342	0.474039	32.389
cGJ-1-4-12	32.9839	65.8692	249.43	7515.22	2.91816	61.882	12.6749	9.67914	324.04	16.0859	0.68557	1.42937	0.854736	6.66492	1.87326	19.364	6.99943	29.4561	6.2769	0.458873	32.4069
cGJ-1-4-13	33.0031	65.8492	248.044	7475.6	4.05717	61.8975	12.5452	10.0208	326.591	15.9912	0.618235	1.5469	1.076	7.12644	1.96384	19.5595	6.92974	29.1462	6.39851	0.482537	32.5599
cGJ-1-4-14	31.6529	67.2092	246.045	7444.45	3.15036	62.3532	12.5189	9.68131	324.469	15.6267	0.555086	1.51486	1.03884	6.76701	1.95301	19.9263	6.77678	29.2725	6.23289	0.475804	32.3798
cGJ-1-4-15	32.5014	66.3748	243.778	7379.06	3.57291	61.5638	12.4122	9.73702	320.853	15.7784	0.573182	1.39325	1.05871	6.88127	1.9211	19.2575	6.77901	29.1326	6.32202	0.480756	32.0117
cGJ-1-4-16	32.8837	65.978	246.341	7421.68	3.97795	61.6783	12.3838	9.63772	330.118	15.9879	0.636556	1.42137	1.09573	6.87776	1.86875	19.3039	6.79167	29.1442	6.26127	0.479237	32.3505
cGJ-1-4-17	33.0812	65.7717	241.396	7476.16	3.91243	61.2773	12.3456	9.55188	323.497	15.8249	0.606537	1.4299	0.950874	6.62951	1.95566	19.7729	6.73087	28.8417	6.05568	0.518237	32.1743
cGJ-1-4-18	32.1779	66.6888	241.836	7390.26	3.69474	61.7088	12.2809	9.70544	317.231	15.6955	0.642805	1.5271	1.0287	6.6295	1.91926	20.1636	6.84054	29.519	6.31067	0.492146	32.1706
cGJ-1-4-19	32.0571	66.8016	246.051	7411.2	3.60593	62.345	12.4157	9.88831	326.323	16.1272	0.679078	1.51528	0.986073	7.35446	1.89224	19.5982	6.70777	28.6027	6.31639	0.492761	32.1707
cGJ-1-4-20	32.6007	66.2615	239.716	7433.93	3.86805	61.2795	12.1826	9.73433	319.06	15.8743	0.639787	1.34097	1.03179	6.82337	1.91985	19.6765	6.78835	28.2406	6.20584	0.460748	32.0565
Mean	33.1404	65.7564	252.591	7492.31	3.95297	62.3002	12.7718	9.63979	327.436	16.1501	0.605155	1.46812	1.00684	7.00115	1.94615	20.2723	6.87243	30.3908	6.35872	0.483881	33.0948
1 σ	0.897498	0.924562	9.16307	204.226	0.734038	1.23703	0.548089	0.244818	5.68662	0.406944	0.0529942	0.0866309	0.0627525	0.258606	0.0653436	0.700997	0.173851	1.41923	0.146092	0.0221607	0.915192
RSD%	2.70817	1.40604	3.62764	2.72582	18.5693	1.9856	4.29141	2.53966	1.73671	2.51977	8.75712	5.90082	6.23261	3.69376	3.35759	3.4579	2.52968	4.66994	2.29751	4.57978	2.76536
Solution ICP-MS			255	6980	3.19	61.8	12.8	9.33	321	15.4	0.61	4.44	0.95	6.55	1.87	20	6.94	29.8	6.53	0.45	29.3
2σ			2.74	63.3	0.37	0.57	0.12	0.09	4.56	0.16	0.01	0.48	0.02	0.06	0.02	0.17	0.07	0.26	0.05	0.02	0.57
LA-Liu08a1)	32.4	66.7	241	7026	3.51	62.3	12.8	8.36	288	14.9	0.55	1.35	0.86	6.35	1.78	19.5	6.53	29.1	6.29		28.6
	0.11	0.11	2.81	22.6	0.34	1.02	0.18	0.09	1.91	0.077	0.04	0.07	0.02	0.14	0.03	0.25	0.08	0.41	0.08		0.18
LA-Liu08a2)	32	67.1	249	7074	4.55	62.8	12.8	8.84	301	15.7	0.54	1.32	0.88	6.72	1.82	19.1	6.45	30.9	6.25	0.45	29.5
	0.16	0.16	3.15	44.8	1.18	0.81	0.12	0.3	4.3	0.24	0.09	0.15	0.05	0.19	0.04	0.32	0.05	0.6	0.05	0.02	0.46
a LA-ICP-MS data obtained from IGGCAS laboratory
b LA-ICP-MS data obtained from SSATC laboratory
c LA-ICP-MS data obtained from IUG-ALBR laboratory
a1, a2) calibrated against BCR-2G and BIR-1G without applying an internal standard;Solution ICP-MS: zircon powder was digested in Teflon bomb with HF+HNO3 at 195℃ for 5 days, and ten analyzed by solution-ICP-MS. The data were from Liu et al. (2010).
