# Supplementary material for: High-accuracy analyses of key minor and trace elements in zircon by electron probe microanalysis
Source: Royal Society of Chemistry journal article supplement (doi:10.1039/d5ja00150a), 2025-11-03
Supplement: d5ja00150a4.xlsx [file d5ja00150a4.xlsx]

## Sheet: Sheet1
	Det.Lim ppm					Beam curr (nA)							Peak Time (s)							StdDev wt%
Comment	Yb	Al	Th	Ti	O	Yb	Al	Al SP1/1	Al SP4/1	Th	Ti	O	Yb	Al	Al SP1/1	Al SP4/1	Th	Ti	O	Yb	Al	Th	Ti	O	Point#	Comment	X	Y	Z	Date
TAP1_20s_40nA	710	184	590	124		39.6649	39.6649			39.6649	39.6649		20	20			20	20		0.0595	0.0155	0.0488	0.0105		1	TAP1_20s_40nA	11639	-32117	511	2025-09-16 12:04:46
TAP1_20s_100nA	390	147	378	81		98.9867	98.9867			98.9867	98.9867		20	20			20	20		0.0324	0.0121	0.031	0.0068		2	TAP1_20s_100nA	11627	-32104	506	2025-09-16 12:10:17
TAP1_20s_200nA	332	88	264	57		197.043	197.043			197.043	197.043		20	20			20	20		0.0276	0.0074	0.022	0.0048		3	TAP1_20s_200nA	11586	-32069	501	2025-09-16 12:36:43
TAP1_20s_400nA	202	70	176	41		397.549	397.549			397.549	397.549		20	20			20	20		0.0168	0.0058	0.0148	0.0034		4	TAP1_20s_400nA	11592	-32058	503	2025-09-16 12:40:36
TAP1_20s_500nA	174	67	155	37		501.419	501.419			501.419	501.419		20	20			20	20		0.0144	0.0056	0.013	0.0031		5	TAP1_20s_500nA	11593	-32024	501	2025-09-16 12:45:07
TAP1_20s_600nA	183	45	155	31		586.871	586.871			586.871	586.871		20	20			20	20		0.0153	0.0038	0.0129	0.0026		6	TAP1_20s_600nA	11617	-32028	502	2025-09-16 12:48:38
TAP1_20s_700nA	158	50	142	30		652.791	652.791			652.791	652.791		20	20			20	20		0.0131	0.0042	0.0118	0.0025		7	TAP1_20s_700nA	11642	-32062	507	2025-09-16 12:51:58
TAP1_60s_700nA	97	32	79	19		640.583	640.583			640.583	640.583		60	60			60	60		0.0081	0.0027	0.0066	0.0016		8	TAP1_60s_700nA	11658	-32069	498	2025-09-16 12:55:49
TAP1_60s_600nA	98	34	83	20		581.683	581.683			581.683	581.683		60	60			60	60		0.0082	0.0028	0.0069	0.0016		9	TAP1_60s_600nA	11634	-32054	497	2025-09-16 13:02:12
TAP1_60s_500nA	99	36	86	20		518.815	518.815			518.815	518.815		60	60			60	60		0.0082	0.003	0.0072	0.0017		10	TAP1_60s_500nA	11607	-32068	502	2025-09-16 13:08:47
TAP1_60s_400nA	120	36	102	22		399.792	399.792			399.792	399.792		60	60			60	60		0.01	0.003	0.0085	0.0019		11	TAP1_60s_400nA	11590	-32056	500	2025-09-16 13:21:12
TAP1_60s_200nA	153	51	143	31		215.186	215.186			215.186	215.186		60	60			60	60		0.0127	0.0042	0.012	0.0026		12	TAP1_60s_200nA	11552	-32058	497	2025-09-16 13:27:29
TAP1_60s_100nA	238	69	191	44		113.697	113.697			113.697	113.697		60	60			60	60		0.0199	0.0057	0.0158	0.0036		13	TAP1_60s_100nA	11547	-32078	497	2025-09-16 13:33:25
TAP1_60s_40nA	384	91	312	62		46.9679	46.9679			46.9679	46.9679		60	60			60	60		0.0321	0.0075	0.0259	0.0052		14	TAP1_60s_40nA	11534	-32040	496	2025-09-16 13:45:57
TAP1_120s_40nA	240	77	215	47		47.029	47.029			47.029	47.029		120	120			120	120		0.0199	0.0064	0.0181	0.0039		15	TAP1_120s_40nA	11501	-32011	492	2025-09-16 13:52:13
TAP1_120s_100nA	167	50	150	32		100.253	100.253			100.253	100.253		120	120			120	120		0.0139	0.0041	0.0125	0.0026		16	TAP1_120s_100nA	11467	-32010	491	2025-09-16 14:02:29
TAP1_120s_200nA	117	39	99	23		201.575	201.575			201.575	201.575		120	120			120	120		0.0097	0.0033	0.0083	0.0019		17	TAP1_120s_200nA	11431	-32003	489	2025-09-16 14:12:39
TAP1_120s_400nA	93	27	71	17		377.285	377.285			377.285	377.285		120	120			120	120		0.0078	0.0022	0.0059	0.0014		18	TAP1_120s_400nA	11455	-32002	495	2025-09-16 14:22:53
TAP1_120s_500nA	74	22	64	14		519.12	519.12			519.12	519.12		120	120			120	120		0.0062	0.0018	0.0053	0.0012		19	TAP1_120s_500nA	11490	-32002	498	2025-09-16 14:32:58
TAP1_120s_700nA	65	22	54	13		673.543	673.543			673.543	673.543		120	120			120	120		0.0054	0.0018	0.0045	0.0011		20	TAP1_120s_700nA	11510	-31997	501	2025-09-16 14:43:11
TAP1_240s_700nA	46	14	38	9		671.712	671.712			671.712	671.712		240	240			240	195.605		0.0039	0.0012	0.0032	0.0008		21	TAP1_240s_700nA	11490	-31983	505	2025-09-16 14:53:52
TAP1_240s_500nA	53	17	41	10		537.126	537.126			537.126	537.126		240	240			240	240		0.0044	0.0014	0.0034	0.0009		22	TAP1_240s_500nA	11490	-31951	507	2025-09-16 15:10:38
TAP1_240s_400nA	58	20	44	12		422.376	422.376			422.376	422.376		240	240			240	240		0.0049	0.0017	0.0037	0.001		23	TAP1_240s_400nA	11487	-31931	507	2025-09-16 15:29:09
TAP1_240s_100nA	121	34	91	22		118.412	118.412			118.412	118.412		240	240			240	240		0.0101	0.0028	0.0075	0.0018		24	TAP1_240s_100nA	11456	-31935	506	2025-09-16 15:47:46
TAP1_300s_200nA	82	24	63	15		198.767	198.767			198.767	198.767		300	300			300	300		0.0068	0.002	0.0053	0.0013		25	TAP1_300s_200nA	11489	-31915	507	2025-09-16 16:06:53
TAP1_300s_500nA	47	15	41	9		485.855	485.855			485.855	485.855		300	300			300	271.053		0.0039	0.0013	0.0034	0.0008		26	TAP1_300s_500nA	11504	-31917	504	2025-09-16 16:30:03
TAP1_300s_500nA	41	12	36	9		692.16	692.16			692.16	692.16		300	300			300	190.583		0.0035	0.001	0.003	0.0007		27	TAP1_300s_500nA	11492	-31899	503	2025-09-16 16:53:00
TAP1_240/60s_700nA	59	18	46	12		663.472	663.472			663.472	663.472		240	240			240	194.385		0.0049	0.0015	0.0038	0.001		28	TAP1_240/60s_700nA	11467	-31892	506	2025-09-16 20:46:42
TAP1_240/60s_500nA	66	22	48	13		552.385	552.385			552.385	552.385		240	240			240	235.593		0.0055	0.0018	0.004	0.0011		29	TAP1_240/60s_500nA	11447	-31894	507	2025-09-16 21:03:22
TAP1_240/60s_200nA	95	30	76	18		263.161	263.161			263.161	263.161		240	240			240	240		0.0079	0.0025	0.0063	0.0015		30	TAP1_240/60s_200nA	11427	-31907	508	2025-09-16 21:21:29
TAP1_240/60s_40nA	194	48	157	33		69.5516	69.5516			69.5516	69.5516		240	240			240	240		0.0161	0.004	0.013	0.0028		31	TAP1_240/60s_40nA	11393	-31898	507	2025-09-16 21:36:06
TAP2_240/60s_40nA	197	141	197			46.7543		46.7543	46.7543	46.7543			240		240	240	240			0.0163	0.0117	0.0165			32	TAP2_240/60s_40nA	11393	-31884	506	2025-09-16 21:51:41
TAP2_240/60s_100nA	131	50	122			126.225		126.225	126.225	126.225			240		240	240	240			0.0109	0.0042	0.0101			33	TAP2_240/60s_100nA	11408	-31882	507	2025-09-16 22:00:15
TAP2_240/60s_400nA	58	7	59			455.336		455.336	455.336	455.336			240		240	240	240			0.0048	0.0006	0.0049			34	TAP2_240/60s_400nA	11437	-31871	510	2025-09-16 22:08:39
TAP2_240/60s_500nA	56	19	57			542.924		542.924	542.924	542.924			240		240	240	240			0.0046	0.0016	0.0047			35	TAP2_240/60s_500nA	11438	-31908	509	2025-09-16 22:16:18
TAP2_240/60s_700nA	50	20	49			763.878		763.878	763.878	763.878			240		240	240	240			0.0042	0.0017	0.0041			36	TAP2_240/60s_700nA	11407	-31924	507	2025-09-16 22:23:54
TAP2_240s_700nA	41	14	40			757.469		757.469	757.469	757.469			240		240	240	240			0.0034	0.0012	0.0033			37	TAP2_240s_700nA	11382	-31922	507	2025-09-16 22:32:35
TAP2_240s_500nA	45	15	45			558.794		558.794	558.794	558.794			240		240	240	240			0.0038	0.0013	0.0037			38	TAP2_240s_500nA	11388	-31945	507	2025-09-16 22:42:30
TAP2_240s_200nA	72	22	73			223.594		223.594	223.594	223.594			240		240	240	240			0.006	0.0018	0.0061			39	TAP2_240s_200nA	11433	-31982	507	2025-09-16 22:52:22
TAP2_240s_100nA	87	35	87			153.142		153.142	153.142	153.142			240		240	240	240			0.0072	0.0029	0.0073			40	TAP2_240s_100nA	11398	-31986	508	2025-09-16 23:03:50
TAP2_120s_40nA	208	9	210			49.562		49.562	49.562	49.562			120		120	120	120			0.0173	0.0007	0.0174			41	TAP2_120s_40nA	11390	-32004	508	2025-09-16 23:15:10
TAP2_120s_200nA	123	20	113			195.349		195.349	195.349	195.349			120		120	120	120			0.0102	0.0017	0.0094			42	TAP2_120s_200nA	11435	-32014	514	2025-09-16 23:22:04
TAP2_120s_500nA	68	15	69			506.302		506.302	506.302	506.302			120		120	120	120			0.0057	0.0013	0.0058			43	TAP2_120s_500nA	11456	-32038	512	2025-09-16 23:28:32
TAP2_120s_700nA	60	20	58			703.757		703.757	703.757	703.757			120		120	120	120			0.005	0.0017	0.0049			44	TAP2_120s_700nA	11476	-32044	514	2025-09-16 23:34:06
TAP2_60s_700nA	76	-4	79			706.809		706.809	706.809	706.809			60		60	60	60			0.0063	-0.0004	0.0066			45	TAP2_60s_700nA	11516	-32058	519	2025-09-16 23:40:32
TAP2_60s_500nA	94	84	94			533.769		533.769	533.769	533.769			60		60	60	60			0.0078	0.007	0.0079			46	TAP2_60s_500nA	11513	-32033	515	2025-09-16 23:44:27
TAP2_60s_400nA	134	-38	111			408.948		408.948	408.948	408.948			60		60	60	60			0.0112	-0.0031	0.0092			47	TAP2_60s_400nA	11546	-32023	516	2025-09-16 23:48:10
TAP2_60s_100nA	191	731	193			127.689		127.689	127.689	127.689			60		60	60	60			0.0159	0.0608	0.0162			48	TAP2_60s_100nA	11571	-32037	516	2025-09-16 23:52:46
TAP2_60s_40nA	363	30	313			50.1113		50.1113	50.1113	50.1113			60		60	60	60			0.0302	0.0025	0.0261			49	TAP2_60s_40nA	11571	-32037	511	2025-09-16 23:56:56
TAP2_20s_40nA	549	179	541			50.2945		50.2945	50.2945	50.2945			20		20	20	20			0.0455	0.015	0.0444			50	TAP2_20s_40nA	11571	-32037	513	2025-09-17 00:00:38
TAP2_20s_100nA	422	131	397			93.4934		93.4934	93.4934	93.4934			20		20	20	20			0.035	0.0109	0.0332			51	TAP2_20s_100nA	11584	-32076	517	2025-09-17 00:03:00
TAP2_20s_200nA	276	47	272			197.119		197.119	197.119	197.119			20		20	20	20			0.023	0.0039	0.0228			52	TAP2_20s_200nA	11596	-32085	516	2025-09-17 00:05:11
TAP2_20s_400nA	185	121	187			393.811		393.811	393.811	393.811			20		20	20	20			0.0153	0.01	0.0157			53	TAP2_20s_400nA	11615	-32087	517	2025-09-17 00:07:16
TAP2_20s_500nA	188	34	172			506.607		506.607	506.607	506.607			20		20	20	20			0.0157	0.0029	0.0143			54	TAP2_20s_500nA	11619	-32104	520	2025-09-17 00:09:21
TAP2_20s_600nA	194	16	160			592.669		592.669	592.669	592.669			20		20	20	20			0.0161	0.0013	0.0133			55	TAP2_20s_600nA	11634	-32122	525	2025-09-17 00:11:22
TAP2_20s_700nA	134	10	138			681.173		681.173	681.173	681.173			20		20	20	20			0.0111	0.0008	0.0116			56	TAP2_20s_700nA	11638	-32104	529	2025-09-17 00:13:30

## Sheet: Al
Supplemental Table S3.Variation of detection limits (ppm, 3σ) for Yb, Al, Th, and Ti under different analytical conditions.
Comment	Yb	Ala	Alb	Th	Tia	Tib
20kV_20s_40nA	710	184	146	590	124
20kV_20s_100nA	390	131	93	378	81
20kV_20s_200nA	302	88	63	264	57
20kV_20s_400nA	202	70	48	176	41
20kV_20s_500nA	183	57	34	155	37
20kV_20s_600nA	174	45	28	155	31
20kV_20s_700nA	168	39	25	142	30
20kV_60s_40nA	384	91		312	62
20kV_60s_100nA	238	69		191	44
20kV_60s_200nA	153	51		143	31
20kV_60s_400nA	120	36		102	22
20kV_60s_500nA	99	36		86	20
20kV_60s_600nA	98	34		83	20
20kV_60s_700nA	97	32		79	19
20kV_120s_40nA	240	77	55	215	47
20kV_120s_100nA	167	50	32	150	32
20kV_120s_200nA	117	39	26	99	23
20kV_120s_400nA	93	27	18	71	17
20kV_120s_500nA	74	22	16	64	15
20kV_120s_600nA	70	22	16	59	14
20kV_120s_700nA	66	22	16	54	13
20kV_240s_40nA	156	56	43	138	35	36
20kV_240s_100nA	121	38	30	91	22	23
20kV_240s_200nA	98	28	22	61	18	19
20kV_240s_400nA	69	20	17	54	12	14
20kV_240s_500nA	53	17	14	41	10	12
20kV_240s_600nA	50	16	14	40	9	11
20kV_240s_700nA	48	14	14	38	9	10
20kV_300s_40nA	144			100	25
20kV_300s_100nA	110			81	19
20kV_300s_200nA	82			66	15
20kV_300s_400nA	60			52	13
20kV_300s_500nA	49			41	10
20kV_300s_600nA	45			39	9
20kV_300s_700nA	41			36	9
Ala, using one TAP crystal; Alb, using two combined TAP crystals.
Tia, background time is half of peak time; Tib, peak time-240 s, background time-60 s.
