# Supplementary material for: High-accuracy analyses of key minor and trace elements in zircon by electron probe microanalysis
Source: Royal Society of Chemistry journal article supplement (doi:10.1039/d5ja00150a), 2025-11-03
Supplement: d5ja00150a5.xlsx [file d5ja00150a5.xlsx]

## Sheet: Final results
Supplemental Table S4. Major, minor and trace element results (wt.%) in GJ-1, Qinghu, and Tanz zircon RMs analyzed using EPMA.
Comment	Si	Zr	Hf	O	Al	Y	Yb	Lu	P	Ti	Th	U
GJ-1-S1	15.3367	48.5381	0.7494	35.5649	0.0003	0.0252	0.0049	0.00129	0.0182	0.0005	-0.0018	0.032
GJ-1-S2	15.2918	48.4875	0.7618	35.559	0.0011	0.0261	0.005	0.00129	0.0186	-0.0002	-0.0017	0.0324
GJ-1-S3	15.1066	49.2799	0.7218	35.515	0.0008	0.0255	0.0043	0.00209	0.0194	0.0003	0.0012	0.032
GJ-1-S4	15.4135	48.8432	0.7563	35.2575	0.0002	0.0254	0.004	0.00259	0.0187	0	-0.0015	0.0286
GJ-1-S5	15.7236	48.5989	0.6793	35.4692	0.0005	0.0265	0.0069	0.00329	0.0175	0.0009	-0.0017	0.0291
GJ-1-S6	15.7717	48.8979	0.7078	35.6262	0.0007	0.0254	0.006	0.00199	0.0185	0.001	-0.0015	0.031
GJ-1-S7	15.767	48.2987	0.7898	35.784	0.0007	0.0243	0.0039	-1e-05	0.0174	0	-0.0013	0.0299
GJ-1-S8	15.6559	48.7614	0.7081	35.4599	0.0007	0.0257	0.0043	0.00309	0.0186	0.0006	-0.0027	0.0313
GJ-1-S9	15.7089	48.6424	0.7382	35.4865	0.001	0.0248	0.0043	0.00209	0.0176	0.0009	-0.002	0.0333
GJ-1-S10	15.7198	48.1799	0.7409	35.685	0.0006	0.0252	0.0042	0.00049	0.0189	0.0007	-0.0012	0.0304
GJ-1 -E1	15.3367	49.5381	0.7494	35.0185	0.0004	0.0236	0.0056	-0.00031	0.019	0.0007	-0.0019	0.032
GJ-1 -E2	15.2918	48.6875	0.7618	34.7385	0.0009	0.0255	0.0053	0.00419	0.018	0.001	-0.0024	0.0319
GJ-1 -E3	15.1066	49.2799	0.7218	34.6668	0.0007	0.0241	0.0051	0.00619	0.0175	0.0009	-0.0019	0.0312
GJ-1 -E4	15.4135	48.8432	0.7563	34.7313	0.001	0.0248	0.0045	0.00069	0.0182	0.0006	-0.0013	0.0351
GJ-1 -E5	15.2657	48.7896	0.7865	34.8223	0.0008	0.0249	0.0048	0.00179	0.0187	0.0006	-0.0017	0.0309
Mean	15.4607	48.7777	0.741947	35.2923	0.000693333	0.0251333	0.00487333	0.00205	0.01832	0.000566667	-0.00156	0.0314067
Tanz-S1	15.5655	48.0633	1.3491	34.8783	0.0011	0.0191	0.0006	0.0002	0.0217	0.0024	0.0071	0.0403
Tanz-S2	15.4905	47.694	1.3125	34.6644	0.0013	0.0212	-0.0021	0.0014	0.0221	0.0022	0.007	0.0411
Tanz-S3	15.461	47.1399	1.3156	34.422	0.0004	0.02	0.0032	0.0006	0.0211	0.0024	0.0069	0.0412
Tanz-S4	15.4718	48.0079	1.2876	34.736	0.0002	0.0227	0.0002	0.0039	0.0208	0.0025	0.0077	0.0413
Tanz-S5	15.2558	47.2606	1.2981	34.2285	0.0003	0.0208	-0.0019	0.0028	0.0206	0.002	0.0066	0.0411
Tanz-S6	15.1579	47.9228	1.3324	34.0051	0.0009	0.0193	-0.0016	0.0024	0.0208	0.0023	0.0059	0.0388
Tanz-S7	15.2335	47.5868	1.3651	34.3369	0.0013	0.0222	0.0004	0.0036	0.022	0.0023	0.0058	0.0383
Tanz-S8	15.2168	47.8365	1.3329	34.042	0.0007	0.022	-0.001	0.0015	0.0214	0.0025	0.007	0.0403
Tanz-S9	15.3225	48.1695	1.3084	34.2734	0.0004	0.021	0.001	0.0016	0.0208	0.002	0.0054	0.0414
Tanz-S10	15.2403	48.1525	1.2911	34.1815	0.0006	0.0214	0.0017	-0.0016	0.0208	0.0024	0.0058	0.0401
Tanz -E1	15.8531	46.9073	1.4031	34.966	0.0005	0.0224	-0.0046	0.0042	0.0222	0.0024	0.0065	0.0392
Tanz -E2	15.7316	46.6903	1.3731	34.666	0.0009	0.0217	0.0012	-0.001	0.0215	0.0025	0.0063	0.0417
Tanz -E3	15.9334	46.7594	1.369	34.9209	0.001	0.0194	0.002	0.006	0.0223	0.0019	0.0057	0.0419
Tanz -E4	15.8096	46.9744	1.3681	34.819	0.0001	0.0197	-0.0004	0.0018	0.0212	0.0015	0.0063	0.0411
Tanz -E5	15.9134	46.896	1.3439	34.7682	0.0012	0.0206	0.0002	0.0027	0.0221	0.0026	0.0068	0.0406
Mean	15.5104	47.4707	1.33667	34.5272	0.000726667	0.0209	-7.33333e-05	0.00200667	0.0214267	0.00226	0.00645333	0.04056
Qinghu-S1	15.052	48.3346	1.2399	35.1889	0.0109	0.0412	0.0014	0.00168	0.056	0.0074	0.0126	0.1026
Qinghu-S2	15.2403	48.6354	1.2128	35.2276	0.0113	0.0356	0.0023	0.00238	0.0531	0.0066	0.0124	0.1012
Qinghu-S3	15.1805	48.5906	1.2247	35.3768	0.0099	0.0482	0.0048	-0.00042	0.0605	0.0065	0.0105	0.103
Qinghu-S4	15.0737	48.1793	1.3011	35.3976	0.0051	0.029	0.0025	0.00168	0.04	0.0057	0.0139	0.0967
Qinghu-S5	15.3353	48.0742	1.2872	35.3326	0.0047	0.028	0.0007	-0.00092	0.0372	0.0063	0.0108	0.0988
Qinghu-S6	15.227	48.3448	1.2915	35.1802	0.0053	0.0276	0.002	0.00548	0.038	0.0061	0.0019	0.0454
Qinghu-S7	15.289	48.2678	1.2888	35.2163	0.0051	0.0465	0.0032	0.00168	0.0532	0.0084	0.0027	0.0517
Qinghu-S8	15.2132	48.3138	1.2853	35.2924	0.0044	0.0478	0.0045	0.00248	0.0532	0.0077	0.0025	0.0594
Qinghu-S9	15.2114	48.3226	1.2683	35.1796	0.0113	0.0656	0.0084	0.00228	0.0879	0.0069	0.0031	0.0643
Qinghu-S10	15.3756	48.7519	1.1762	35.3205	0.0105	0.0665	0.0063	0.00128	0.08	0.0067	0.0011	0.0273
Qinghu-E1	15.3488	48.6043	1.3125	34.6111	0.0062	0.0284	0.004	-0.00292	0.0372	0.0076	0.0042	0.0694
Qinghu-E2	15.052	48.3346	1.3884	34.482	0.0105	0.0624	0.0072	0.00348	0.0702	0.0076	0.0038	0.0718
Qinghu-E3	15.2403	48.6354	1.2051	34.8358	0.0061	0.0933	0.0067	0.00378	0.0839	0.0077	0.0044	0.0763
Qinghu-E4	15.1805	48.5906	1.2229	34.7131	0.01	0.0299	0.0062	-0.00012	0.048	0.007	0.0036	0.0687
Qinghu-E5	15.0737	48.1793	1.3571	34.4799	0.0078	0.0463	0.0033	0.00128	0.0515	0.0063	0.0045	0.064
Mean	15.2062	48.4106	1.27079	35.0556	0.00794	0.04642	0.00423333	0.00154	0.05666	0.0075	0.00613	0.0733733

## Sheet: Ti
Supplemental Table S3. Accuracy improvement of minor and trace element measurement in GJ-1, Qinghu, and Tanz zircon RMs using EPMA.
Element	Zircon RM	Analysis condition	Crystal	Bg-	Bg+	EPMA result (μg/g)	SD (μg/g)
Ti	Qinghu	AC 1	LPET	-500	500	24	17
	Qinghu		LPET	-500	500	28	17
	Qinghu	AC 2	LPET	-500	1000	31	12
	Qinghu		LPET	-500	1000	27	12
	Qinghu	AC 3	LPET	-400	1000	34	12
	Qinghu	AC 4	LPET	-400	800	36	12
	Qinghu	AC 5	LPET	-900	850	40	12
	Qinghu	AC 6	LPET	-600	800	40	12
	Qinghu		LPET	-600	800	45	12
	Qinghu		LPET	-600	800	53	12
	Qinghu		LPET	-600	800	46	12
	Qinghu		LPET	-600	800	53	12
	Qinghu	AC 7	LPET	-650	650	50	12
	Qinghu		LPET	-650	650	58	12
	Qinghu		LPET	-650	650	56	14
	Qinghu		LPET	-650	650	53	14
	Qinghu	AC 8	LPET	-650	650	66	14
	Qinghu		LPET	-650	650	74	14
	Qinghu		LPET	-650	650	71	14
	Qinghu		LPET	-650	650	63	14
	Qinghu		LPET	-650	650	56	14
	Qinghu		LPET	-650	650	49	14
	Qinghu		LPET	-650	650	42	14
	Qinghu		LPET	-650	650	71	14
	CE6	AC 9	LPET	-650	650	-4	14
	CE6		LPET	-650	650	-2	14
	Qinghu	AC 10	LPET	-750	450	74	8
	Qinghu		LPET	-750	450	66	8
	Qinghu		LPET	-750	450	65	8
	Qinghu		LPET	-750	450	57	8
	Qinghu		LPET	-750	450	63	8
	Qinghu		LPET	-750	450	61	8
	Qinghu		LPET	-750	450	84	8
	Qinghu		LPET	-750	450	77	8
	Qinghu		LPET	-750	450	69	8
	Qinghu		LPET	-750	450	67	8
	Qinghu		LPET	-750	450	76	9
	Qinghu		LPET	-750	450	76	9
	Qinghu		LPET	-750	450	77	9
	Qinghu		LPET	-750	450	70	9
	Qinghu		LPET	-750	450	63	9

## Sheet: P
Supplemental Table S3. Accuracy improvement of minor and trace element measurement in GJ-1, Qinghu, and Tanz zircon RMs using EPMA.
Element	Zircon RM	Analysis condition	Crystal	Bg-	Bg+	EPMA result (μg/g)	SD (μg/g)
P	GJ-1	AC 1	LPET	-800	800	-1900	88
	GJ-1		LPET	-800	800	-1892	88
	GJ-1		LPET	-800	800	-1906	88
	GJ-1	AC 2	LPET	-800	1000	-1852	88
	GJ-1		LPET	-800	1000	-1652	88
	GJ-1	AC 3	LPET	-2000	1400	1043	60
	GJ-1		LPET	-2000	1400	1245	60
	GJ-1	AC 4	LPET	-2000	1100	1723	56
	GJ-1		LPET	-2000	1100	1658	56
	GJ-1	AC 5	LPET	-1900	800	1361	56
	GJ-1		LPET	-1900	800	1159	56
	GJ-1	AC 6	LPET	None	800	27.1	56
	GJ-1		LPET	None	800	29.6	56
	GJ-1	AC 7	LPET	None	600	234	56
	GJ-1		LPET	None	600	335	56
	GJ-1	AC 8	LPET	None	400	221	54
	GJ-1		LPET	None	400	244	54
	GJ-1	AC 9	LPET	None	400	214	52
	GJ-1		LPET	None	400	216	52
	GJ-1		LPET	None	400	204	52
	GJ-1		LPET	None	400	215	52
	GJ-1		LPET	None	400	225	52
	GJ-1		LPET	None	400	211	52
	GJ-1		LPET	None	400	219	52
	GJ-1		LPET	None	400	221	52
	GJ-1		LPET	None	400	220	52
	GJ-1		LPET	None	400	216	52
	GJ-1	AC 10	LPET	None	300	182	36
	GJ-1		LPET	None	300	186	36
	GJ-1		LPET	None	300	194	36
	GJ-1		LPET	None	300	187	36
	GJ-1		LPET	None	300	175	36
	GJ-1		LPET	None	300	185	36
	GJ-1		LPET	None	300	174	36
	GJ-1		LPET	None	300	186	36
	GJ-1		LPET	None	300	176	36
	GJ-1		LPET	None	300	189	36
	GJ-1	AC 10	LPET	None	300	190	40
	GJ-1		LPET	None	300	180	40
	GJ-1		LPET	None	300	175	40
	GJ-1		LPET	None	300	182	40
	GJ-1		LPET	None	300	187	40

## Sheet: Al
Supplemental Table S3. Accuracy improvement of minor and trace element measurement in GJ-1, Qinghu, and Tanz zircon RMs using EPMA.
Element	Zircon RM	Analysis condition	Crystal	Bg-	Bg+	EPMA result (μg/g)	SD (μg/g)
Al	Qinghu	AC 1	TAP_Sp1	-1800	1000	14	28
	Qinghu		TAP_Sp4	-1800	1000	9	28
	Qinghu	AC 2	TAP_Sp1	-300	900	9	28
	Qinghu		TAP_Sp4	-600	800	30	28
	Qinghu					12	28
	Qinghu	AC 3	TAP_Sp1	-700	900	-8	28
	Qinghu		TAP_Sp4	-700	1000	-9	28
	Qinghu	AC 4	TAP_Sp1	-300	900	10	28
	Qinghu		TAP_Sp4	-600	800	12	28
	Qinghu	AC 5	TAP_Sp1	-300	900	40	24
	Qinghu		TAP_Sp4	-600	800	46	24
	Qinghu	AC 6	TAP_Sp1	-250	450	109	22
	Qinghu		TAP_Sp4	-150	350	113	22
	Qinghu					99	22
	Qinghu					51	22
	Qinghu					47	22
	Qinghu					53	22
	Qinghu					51	22
	Qinghu					44	22
	Qinghu					113	22
	Qinghu					105	22
	CE-6	AC 7	TAP_Sp1	-250	450	-225	24
	CE-6		TAP_Sp4	-150	350	-203	24
	Qinghu	AC 8	TAP_Sp1	-600	450	80	24
	Qinghu		TAP_Sp4	-550	500	85	24
	Qinghu					82	24
	Qinghu					70	24
	Qinghu					61	24
	Qinghu					68	24
	Qinghu					100	24
	Qinghu					103	24
	Qinghu					75	24
	Qinghu					78	24
	Qinghu	AC 8	TAP_Sp1	-600	450	62	22
	Qinghu		TAP_Sp4	-550	500	105	22
	Qinghu					61	22
	Qinghu					100	22
	Qinghu					78	22

## Sheet: Y
Supplemental Table S3. Accuracy improvement of minor and trace element measurement in GJ-1, Qinghu, and Tanz zircon RMs using EPMA.
Element	Zircon RM	Analysis condition	Crystal	Bg-	Bg+	EPMA result (μg/g)	SD (μg/g)
Y	GJ-1	AC 1	LPET	-500	500	-20	76
	GJ-1					-50	76
	GJ-1					-54	76
	GJ-1	AC 2	LPET	-1000	500	114	104
	GJ-1					135	104
	GJ-1					116	104
	GJ-1	AC 3	LPET	-400	400	121	104
	GJ-1					81	104
	GJ-1					96	104
	GJ-1					122	104
	GJ-1					118	104
	GJ-1	AC 4	TAP_Sp1	-500	900	-2202	146
	GJ-1		TAP_Sp4	-500	900	-2149	146
	GJ-1					-2156	246
	GJ-1	AC 5	TAP_Sp1	-500	200	-1241	112
	GJ-1		TAP_Sp4	-500	200	-1090	112
	GJ-1	AC 6	TAP_Sp1	-400	200	130	112
	GJ-1		TAP_Sp4	-400	200	150	112
	GJ-1	AC 7	TAP_Sp1	-200	200	97	84
	GJ-1		TAP_Sp4	-200	200	112	84
	GJ-1					110	84
	GJ-1					119	84
	GJ-1					112	84
	GJ-1					99	84
	GJ-1					131	84
	GJ-1					132	84
	GJ-1					129	84
	GJ-1					103	84
	GJ-1	AC 8	TAP_Sp1	-300	None	252	74
	GJ-1		TAP_Sp4	-300	None	261	74
	GJ-1					255	74
	GJ-1					254	74
	GJ-1					265	74
	GJ-1					254	74
	GJ-1					243	74
	GJ-1					257	74
	GJ-1					248	74
	GJ-1					252	74
	GJ-1	AC 9	TAP_Sp1	-300	None	251	56
	GJ-1		TAP_Sp4	-200	None	267	56
	GJ-1					259	56
	GJ-1					285	56
	GJ-1					284	56
	GJ-1					250	56
	GJ-1					258	56
	GJ-1					234	56
	GJ-1					265	56
	GJ-1					262	56
	GJ-1	AC 9	TAP_Sp1	-300	None	236	56
	GJ-1		TAP_Sp4	-200	None	255	56
	GJ-1					241	56
	GJ-1					248	56
	GJ-1					249	56

## Sheet: Yb
Supplemental Table S3. Accuracy improvement of minor and trace element measurement in GJ-1, Qinghu, and Tanz zircon RMs using EPMA.
Element	Zircon RM	Analysis condition	Crystal	Bg-	Bg+	EPMA result (μg/g)	SD (μg/g)
Yb	GJ-1	AC 1	LLIF	-500	700	34	85
	GJ-1		LLIF	-500	700	11	85
	GJ-1		LLIF	-500	700	25	85
	GJ-1	AC 2	LLIF	-700	1000	21	61
	GJ-1		LLIF	-700	1000	11	61
	GJ-1	AC 3	LLIF	-700	1500	53	56
	GJ-1		LLIF	-700	1500	28	56
	GJ-1	AC 4	LLIF	-700	2000	62	56
	GJ-1		LLIF	-700	2000	17	56
	GJ-1		LLIF	-700	2000	39	56
	GJ-1		LLIF	-700	2000	50	56
	GJ-1		LLIF	-700	2000	34	56
	GJ-1	AC 5	LLIF	-500	2000	54	55
	GJ-1		LLIF	-500	2000	46	55
	GJ-1		LLIF	-500	2000	43	55
	GJ-1	AC 6	LLIF	-500	1600	39	55
	GJ-1		LLIF	-500	1600	41	55
	GJ-1	AC 7	LLIF	-250	500	26	51
	GJ-1		LLIF	-250	500	32	51
	GJ-1		LLIF	-250	500	39	51
	GJ-1		LLIF	-250	500	40	51
	GJ-1		LLIF	-250	500	23	51
	GJ-1		LLIF	-250	500	66	51
	GJ-1		LLIF	-250	500	51	51
	GJ-1		LLIF	-250	500	72	51
	GJ-1		LLIF	-250	500	51	51
	GJ-1		LLIF	-250	500	55	51
	GJ-1	AC 8	LLIF	-530	600	49	51
	GJ-1		LLIF	-530	600	50	51
	GJ-1		LLIF	-530	600	43	51
	GJ-1		LLIF	-530	600	40	51
	GJ-1		LLIF	-530	600	69	51
	GJ-1		LLIF	-530	600	60	51
	GJ-1		LLIF	-530	600	39	51
	GJ-1		LLIF	-530	600	43	51
	GJ-1		LLIF	-530	600	43	51
	GJ-1		LLIF	-530	600	42	51
	GJ-1		LLIF	-530	600	56	51
	GJ-1		LLIF	-530	600	53	51
	GJ-1		LLIF	-530	600	51	51
	GJ-1		LLIF	-530	600	45	51
	GJ-1		LLIF	-530	600	48	51

## Sheet: Hf
Supplemental Table S3. Accuracy improvement of minor and trace element measurement in GJ-1, Qinghu, and Tanz zircon RMs using EPMA.
Element	Zircon RM	Analysis number	Crystal	Bg-	Bg+	EPMA result (wt.%)	SD (wt.%)
Hf	Qinghu	QH_S1	LLIF	-600	650	1.2399	0.16
		QH_S2		-600	650	1.2128	0.16
		QH_S3		-600	650	1.2247	0.16
		QH_S4		-600	650	1.3011	0.16
		QH_S5		-600	650	1.2872	0.16
		QH_S6		-600	650	1.2915	0.16
		QH_S7		-600	650	1.2888	0.16
		QH_S8		-600	650	1.2853	0.16
		QH_S9		-600	650	1.2683	0.16
		QH_S10		-600	650	1.1762	0.16
	GJ-1	GJ-1_S1	LLIF	-600	650	0.7058	0.18
		GJ-1_S2		-600	650	0.7094	0.18
		GJ-1_S3		-600	650	0.6538	0.18
		GJ-1_S4		-600	650	0.7701	0.18
		GJ-1_S5		-600	650	0.6793	0.18
		GJ-1_S6		-600	650	0.7078	0.18
		GJ-1_S7		-600	650	0.7898	0.18
		GJ-1_S8		-600	650	0.7081	0.18
		GJ-1_S9		-600	650	0.7382	0.18
		GJ-1_S10		-600	650	0.7409	0.18
	Tanz	Tanz_S1	LLIF	-600	650	1.3491	0.15
		Tanz_S2		-600	650	1.3125	0.15
		Tanz_S3		-600	650	1.3156	0.15
		Tanz_S4		-600	650	1.2876	0.15
		Tanz_S5		-600	650	1.2981	0.15
		Tanz_S6		-600	650	1.3324	0.15
		Tanz_S7		-600	650	1.3651	0.15
		Tanz_S8		-600	650	1.3329	0.15
		Tanz_S9		-600	650	1.3084	0.15
		Tanz_S10		-600	650	1.2911	0.15
	Qinghu	QH_E1	LLIF	-600	650	1.3125	0.15
		QH_E2		-600	650	1.3884	0.15
		QH_E3		-600	650	1.2051	0.15
		QH_E4		-600	650	1.2229	0.15
		QH_E5		-600	650	1.3571	0.15
		QH_E6		-600	650	1.286	0.15
		QH_E7		-600	650	1.2783	0.15
		QH_E8		-600	650	1.3613	0.15
		QH_E9		-600	650	1.3199	0.15
		QH_E10		-600	650	1.3013	0.15
	GJ-1	GJ-1_E1	LLIF	-600	650	0.7494	0.18
		GJ-1_E2		-600	650	0.7618	0.18
		GJ-1_E3		-600	650	0.7218	0.18
		GJ-1_E4		-600	650	0.7563	0.18
		GJ-1_E5		-600	650	0.7865	0.18
	Tanz	Tanz_E1	LLIF	-600	650	1.4031	0.16
		Tanz_E2		-600	650	1.3731	0.16
		Tanz_E3		-600	650	1.369	0.16
		Tanz_E4		-600	650	1.3681	0.16
		Tanz_E5		-600	650	1.3439	0.16

## Sheet: Th
Supplemental Table S3. Accuracy improvement of minor and trace element measurement in GJ-1, Qinghu, and Tanz zircon RMs using EPMA.
Element	Zircon RM	Analysis number	Crystal	Line	Bg-	Bg+	Bg method	EPMA result (μg/g)	SD (μg/g)
Th	Tanz	AC 1	LPET	Mα	-500	500	Linear	45	43
	Tanz		LPET	Mα	-500	500	Linear	53	45
	Tanz		LPET	Mα	-500	500	Linear	42	46
	Tanz	AC 2	LPET	Mα	-1000	1400	Linear	33	33
	Tanz		LPET	Mα	-1000	1400	Linear	45	45
	Tanz		LPET	Mα	-1000	1400	Linear	30	30
	Tanz	AC 3	LPET	Mα	-750	1400	Linear	31	46
	Tanz		LPET	Mα	-750	1400	Linear	52	46
	Tanz		LPET	Mα	-750	1400	Linear	34	46
	Tanz	AC 4	LPET	Mα	-400	800	Linear	14	46
	Tanz		LPET	Mα	-400	800	Linear	37	46
	Tanz		LPET	Mα	-400	800	Linear	46	46
	Tanz	AC 5	LPET	Mα	-400	800	Exponential	48	46
	Tanz		LPET	Mα	-400	800	Exponential	37	46
	Tanz		LPET	Mα	-400	800	Exponential	47	46
	Tanz		LPET	Mα	-400	800	Exponential	40	46
	Tanz		LPET	Mα	-400	800	Exponential	43	46
	Tanz	AC 6	LPET	Mα	-850	800	Exponential	83	46
	Tanz		LPET	Mα	-850	800	Exponential	119	46
	Tanz		LPET	Mα	-850	800	Exponential	108	46
	Tanz		LPET	Mα	-850	800	Exponential	90	46
	Tanz		LPET	Mα	-850	800	Exponential	94	46
	Tanz		LPET	Mα	-850	800	Exponential	101	46
	Tanz		LPET	Mα	-850	800	Exponential	89	46
	Tanz	AC 7	LPET	Mα	-850	1000	Exponential	85	47
	Tanz		LPET	Mα	-850	1000	Exponential	89	46
	Tanz		LPET	Mα	-850	1000	Exponential	88	48
	Tanz		LPET	Mα	-850	1000	Exponential	92	48
	Tanz		LPET	Mα	-850	1000	Exponential	80	48
	Tanz	AC 8	LPET	Mα	-500	1400	Exponential	71	46
	Tanz		LPET	Mα	-500	1400	Exponential	70	46
	Tanz		LPET	Mα	-500	1400	Exponential	69	46
	Tanz		LPET	Mα	-500	1400	Exponential	77	46
	Tanz		LPET	Mα	-500	1400	Exponential	66	46
	Tanz		LPET	Mα	-500	1400	Exponential	59	46
	Tanz		LPET	Mα	-500	1400	Exponential	58	47
	Tanz		LPET	Mα	-500	1400	Exponential	70	45
	Tanz		LPET	Mα	-500	1400	Exponential	54	46
	Tanz		LPET	Mα	-500	1400	Exponential	58	45
	Tanz		LPET	Mα	-500	1400	Exponential	65	46
	Tanz		LPET	Mα	-500	1400	Exponential	63	46
	Tanz		LPET	Mα	-500	1400	Exponential	57	46
	Tanz		LPET	Mα	-500	1400	Exponential	63	46
	Tanz		LPET	Mα	-500	1400	Exponential	68	46

## Sheet: U
Supplemental Table S3. Accuracy improvement of minor and trace element measurement in GJ-1, Qinghu, and Tanz zircon RMs using EPMA.
Element	Zircon RM	Analysis number	Crystal	Line	Bg-	Bg+	Bg method	EPMA result (μg/g)	SD (μg/g)
U	Tanz	AC 1	LPET	Mα	-500	500	Linear	9	42
	Tanz		LPET	Mα	-500	500	Linear	9	42
	Tanz		LPET	Mα	-500	500	Linear	-16	42
	Tanz	AC 2	LPET	Mα	-800	1000	Linear	-71	42
	Tanz		LPET	Mα	-800	1000	Linear	-86	42
	Tanz		LPET	Mα	-800	1000	Linear	-46	42
	Tanz	AC 3	LPET	Mα	-650	750	Linear	-57	43
	Tanz		LPET	Mα	-650	750	Linear	-28	42
	Tanz		LPET	Mα	-650	750	Linear	-53	42
	Tanz	AC 4	LPET	Mα	-350	750	Linear	132	42
	Tanz		LPET	Mα	-350	750	Linear	101	42
	Tanz		LPET	Mα	-350	750	Linear	147	42
	Tanz	AC 5	LPET	Mα	-300	800	Exponential	162	42
	Tanz		LPET	Mα	-300	800	Exponential	150	42
	Tanz		LPET	Mα	-300	800	Exponential	155	42
	Tanz	AC 6	LPET	Mα	-300	650	Exponential	247	43
	Tanz		LPET	Mα	-300	650	Exponential	238	45
	Tanz		LPET	Mα	-300	650	Exponential	214	42
	Tanz		LPET	Mα	-300	650	Exponential	234	43
	Tanz		LPET	Mα	-300	650	Exponential	217	43
	Tanz		LPET	Mα	-300	650	Exponential	227	43
	Tanz		LPET	Mα	-300	650	Exponential	243	43
	Tanz		LPET	Mα	-300	650	Exponential	224	43
	Tanz	AC 7	LPET	Mβ	-600	1000	Linear	363	57
	Tanz		LPET	Mβ	-600	1000	Linear	382	58
	Tanz		LPET	Mβ	-600	1000	Linear	383	60
	Tanz		LPET	Mβ	-600	1000	Linear	356	57
	Tanz		LPET	Mβ	-600	1000	Linear	380	57
	Tanz		LPET	Mβ	-600	1000	Linear	372	57
	Tanz	AC 8	LPET	Mβ	-600	1000	Exponential	403	58
	Tanz		LPET	Mβ	-600	1000	Exponential	411	58
	Tanz		LPET	Mβ	-600	1000	Exponential	412	58
	Tanz		LPET	Mβ	-600	1000	Exponential	413	58
	Tanz		LPET	Mβ	-600	1000	Exponential	411	57
	Tanz		LPET	Mβ	-600	1000	Exponential	388	58
	Tanz		LPET	Mβ	-600	1000	Exponential	383	57
	Tanz		LPET	Mβ	-600	1000	Exponential	403	58
	Tanz		LPET	Mβ	-600	1000	Exponential	414	58
	Tanz		LPET	Mβ	-600	1000	Exponential	401	58
	Tanz		LPET	Mβ	-600	1000	Exponential	392	57
	Tanz		LPET	Mβ	-600	1000	Exponential	417	57
	Tanz		LPET	Mβ	-600	1000	Exponential	419	57
	Tanz		LPET	Mβ	-600	1000	Exponential	411	57
	Tanz		LPET	Mβ	-600	1000	Exponential	406	57
