# Supplementary material for: High-accuracy analyses of key minor and trace elements in zircon by electron probe microanalysis
Source: Royal Society of Chemistry journal article supplement (doi:10.1039/d5ja00150a), 2025-11-03
Supplement: d5ja00150a6.xlsx [file d5ja00150a6.xlsx]

## Sheet: Sheet1
Supplemental Table S5. Major, minor and trace element data of the zircon in CE-6 anorthosite determined using EPMA.
Comment	Zr	Si	Hf	O	Al	Y	Yb	Lu	P	Ti	Total
	wt.%	wt.%	wt.%	wt.%	ppm	ppm	ppm	ppm	ppm	ppm	wt.%
CE-6_Zir-1	48.4676	15.3027	1.1963	34.8094	502	819	271	99	552	75	100.008
CE-6_Zir-2	47.337	15.6271	1.1705	34.8537	295	740	241	92	529	68	99.1848
CE-6_Zir-3	47.9447	15.5137	1.2275	34.967	511	766	246	63	520	102	99.8737
CE-6_Zir-4	47.5478	15.5434	1.2487	34.8381	181	847	296	95	557	64	99.382
CE-6_Zir-5	48.0876	15.5934	1.2132	34.9967	467	752	247	71	532	60	100.104
CE-6_Zir-6	47.9802	15.6705	1.2254	35.2115	319	793	249	67	525	89	100.292
CE-6_Zir-7	48.2405	15.897	1.2028	35.515	180	829	255	61	561	61	101.05
CE-6_Zir-8	47.4412	15.8274	1.2391	35.0845	485	792	262	78	530	51	99.812
CE-6_Zir-9	47.9428	15.6311	1.1336	35.2546	323	768	243	80	562	76	100.167
CE-6_Zir-10	47.9514	15.7834	1.2668	35.189	215	808	216	38	514	69	100.377
CE-6_Zir-11	48.3517	15.8422	1.2387	35.4333	192	777	250	81	533	68	101.056
CE-6_Zir-12	48.4624	15.1744	1.1411	34.9335	117	757	251	60	503	92	99.8894
