# Supplementary figures and images for: High-accuracy analyses of key minor and trace elements in zircon by electron probe microanalysis
Source: Royal Society of Chemistry journal article supplement (doi:10.1039/d5ja00150a), 2025-11-03

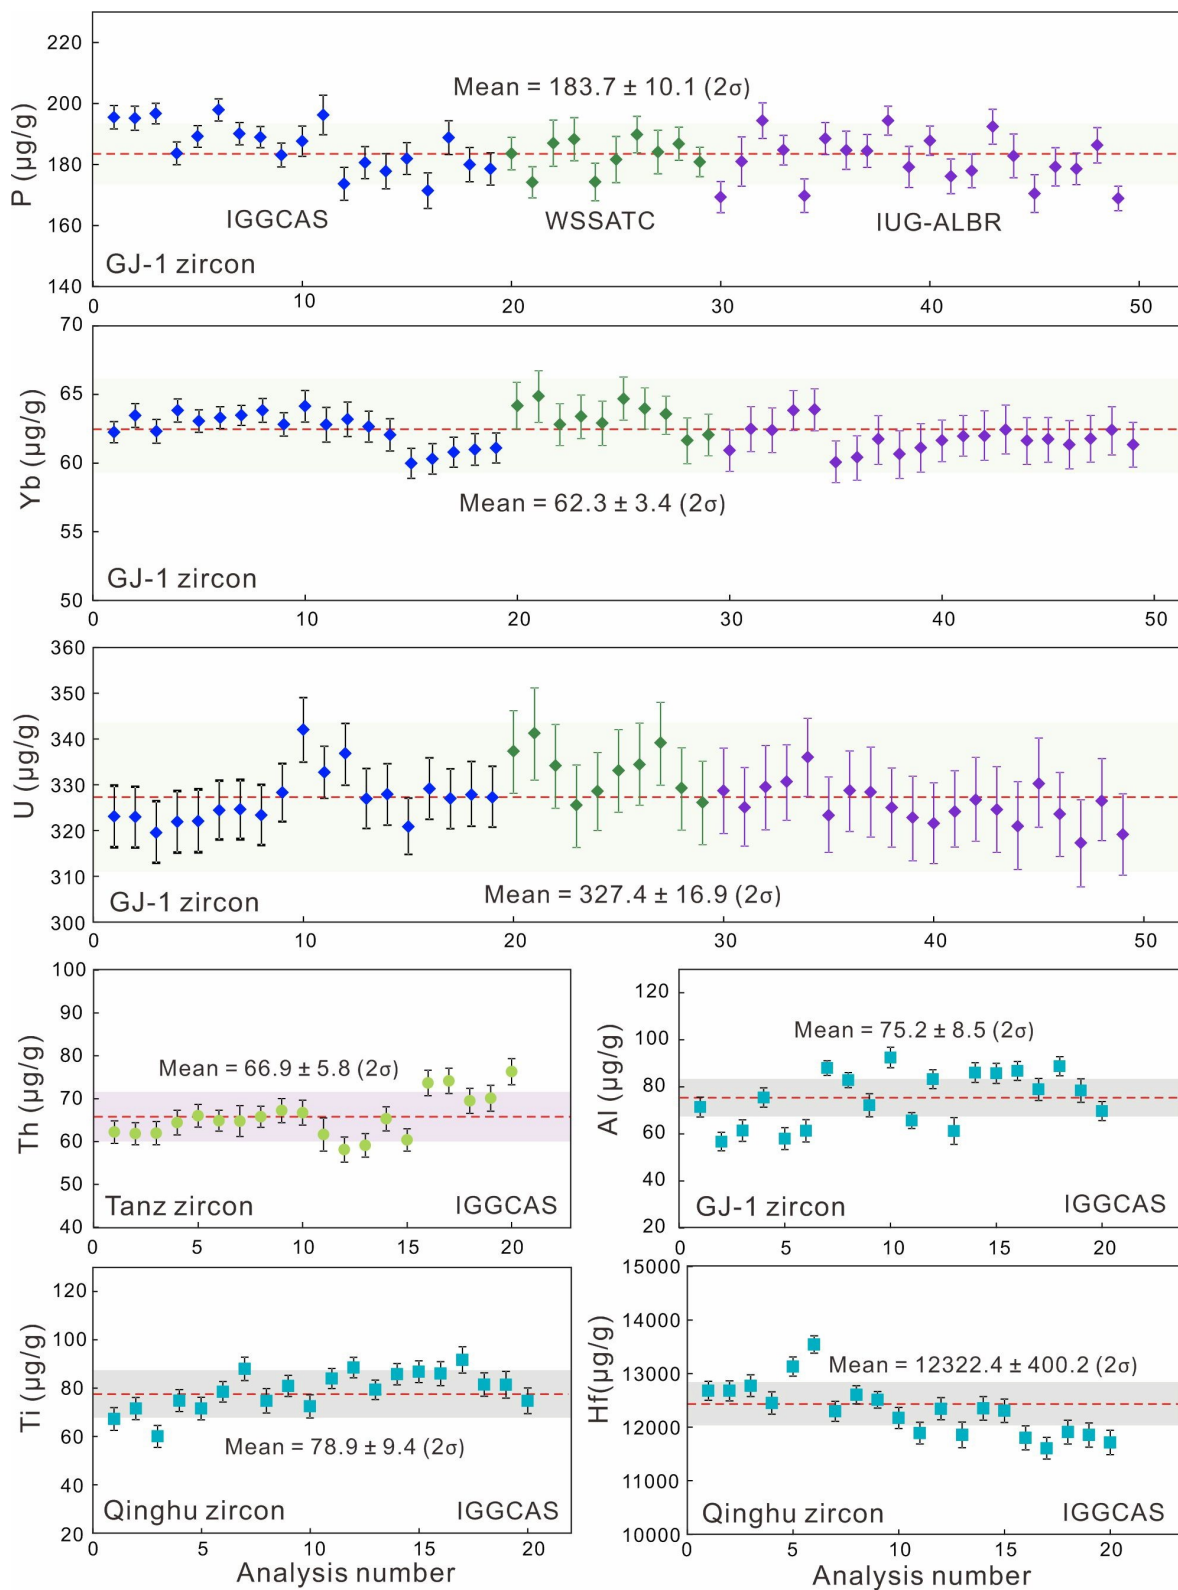

Supplement: d5ja00150a1.pdf [file d5ja00150a1.pdf]
